# Supplementary material for: Metacognition instruction enhances equity in effective study strategies across demographic groups in the general chemistry I course
Source: Royal Society of Chemistry journal article supplement (doi:10.1039/d3rp00103b), 2023-01-01
Supplement: d3rp00103b1.pdf [file d3rp00103b1.pdf]

## APPENDIX

**Table S1** ACT Math and Pre-Term Course GPA Mean Comparison Scores by Students' Demographic Groups in General Chemistry I Course

| ACT Math Scores         |                              |     |      |          |      |       |         |
|-------------------------|------------------------------|-----|------|----------|------|-------|---------|
| Demographics            |                              | N   | Mean | Std. Dev | Df   | t     | p-value |
| Gender                  | Female                       | 166 | 22.8 | 3.7      | 223  | 1.294 | .197    |
|                         | Male                         | 59  | 23.7 | 3.6      |      |       |         |
| Race/Ethnicity          | Racially marginalized groups | 56  | 22.8 | 4.1      | 82.9 | .581  | .563    |
|                         | White                        | 168 | 23.1 | 3.5      |      |       |         |
| First-Generation Status | First-Gen                    | 41  | 21.3 | 3.8      | 223  | 3.346 | <.001*  |
|                         | Non-First Gen                | 184 | 23.4 | 3.5      |      |       |         |
| Pre-Term Course GPA     |                              |     |      |          |      |       |         |
| Demographics            |                              | N   | Mean | Std Dev  | Df   | t     | p-value |
| Gender                  | Female                       | 185 | 3.3  | 0.5      | 255  | 1.381 | .168    |
|                         | Male                         | 72  | 3.2  | 0.6      |      |       |         |
| Race/Ethnicity          | Racially marginalized groups | 69  | 3.4  | 0.5      | 251  | .760  | .448    |
|                         | White                        | 184 | 3.3  | 0.5      |      |       |         |
| First-Generation Status | First-Gen                    | 48  | 3.1  | 0.6      | 255  | 2.940 | .004*   |
|                         | Non-First Gen                | 209 | 3.4  | 0.5      |      |       |         |

\*Indicates that  $p < .01$  and statistically significant.
