# Supplementary material for: Metacognition instruction enhances equity in effective study strategies across demographic groups in the general chemistry I course
Source: Royal Society of Chemistry journal article supplement (doi:10.1039/d3rp00103b), 2023-01-01
Supplement: d3rp00103b2.pdf [file d3rp00103b2.pdf]

## APPENDIX

**Table S1** ACT Math and Pre-Term Course GPA Mean Comparison Scores by Students' Demographic Groups in General Chemistry I Course

| ACT Math Scores         |                              |     |      |          |      |          |                 |
|-------------------------|------------------------------|-----|------|----------|------|----------|-----------------|
| Demographics            |                              | N   | Mean | Std. Dev | Df   | <i>t</i> | <i>p</i> -value |
| Gender                  | Female                       | 166 | 22.8 | 3.7      | 223  | 1.294    | .197            |
|                         | Male                         | 59  | 23.7 | 3.6      |      |          |                 |
| Race/Ethnicity          | Racially marginalized groups | 56  | 22.8 | 4.1      | 82.9 | .581     | .563            |
|                         | White                        | 168 | 23.1 | 3.5      |      |          |                 |
| First-Generation Status | First-Gen                    | 41  | 21.3 | 3.8      | 223  | 3.346    | <.001*          |
|                         | Non-First Gen                | 184 | 23.4 | 3.5      |      |          |                 |
| Pre-Term Course GPA     |                              |     |      |          |      |          |                 |
| Demographics            |                              | N   | Mean | Std Dev  | Df   | <i>t</i> | <i>p</i> -value |
| Gender                  | Female                       | 185 | 3.3  | 0.5      | 255  | 1.381    | .168            |
|                         | Male                         | 72  | 3.2  | 0.6      |      |          |                 |
| Race/Ethnicity          | Racially marginalized groups | 69  | 3.4  | 0.5      | 251  | .760     | .448            |
|                         | White                        | 184 | 3.3  | 0.5      |      |          |                 |
| First-Generation Status | First-Gen                    | 48  | 3.1  | 0.6      | 255  | 2.940    | .004*           |
|                         | Non-First Gen                | 209 | 3.4  | 0.5      |      |          |                 |

\*Indicates that  $p < .01$  and statistically significant.

**Table S2** The reported transfer of acquired study strategies to other courses and the corresponding effect sizes by demographic groups

| <b>Demographics</b>     | <b>Demographic groups (n)</b>     | <b>% Transfer to other courses</b> | <b>Cohen's <i>h</i></b> |
|-------------------------|-----------------------------------|------------------------------------|-------------------------|
| Race/Ethnicity          | Racially marginalized groups (18) | 58.1                               | 0.1                     |
|                         | White (64)                        | 54.2                               |                         |
| Gender                  | Female (66)                       | 56.9                               | 0.2                     |
|                         | Male (17)                         | 48.6                               |                         |
| First-Generation status | First-gen (14)                    | 56.1                               | 0.1                     |
|                         | Non-first gen (69)                | 50.0                               |                         |

*Notes: Cohen's *h* of .2 is a small effect size, *h* = .5 is a moderate effect size, and *h* = .8 is a large effect size (Cohen, 1988).*
